# Supplementary material for: Relation among absorbance shifts, mineralization morphology, and electronic conductivity of π-peptide aggregates with different amino acid residues
Source: Royal Society of Chemistry journal article supplement (doi:10.1039/d2ma00979j), 2023-01-01
Supplement: d2ma00979j1.pdf [file d2ma00979j1.pdf]

**Relation among Absorbance Shifts, Mineralization Morphology, and Electronic Conductivity of  $\pi$ -Peptide Aggregates with Different Amino Acid Residues**

**Table of Contents**

|                                                                                                             |            |
|-------------------------------------------------------------------------------------------------------------|------------|
| <b>Absorption spectra of 4T based <math>\pi</math>-peptides in basic condition .....</b>                    | <b>S2</b>  |
| <b>3D height profile and corresponding laser optical images of 4T based <math>\pi</math>-peptides.....</b>  | <b>S3</b>  |
| <b>AFM images of 4T based <math>\pi</math>-peptides with KCl characterization.....</b>                      | <b>S4</b>  |
| <b>SEM/EDS images of 4T based <math>\pi</math>-peptides with KCl characterization .....</b>                 | <b>S5</b>  |
| <b>Zoomed in XRD graph showing DLAG-4T KCl peak .....</b>                                                   | <b>S8</b>  |
| <b>Transfer and output curves of 4T based <math>\pi</math>-peptide thin films .....</b>                     | <b>S9</b>  |
| <b>OFET device structure and dimensions of gold electrodes .....</b>                                        | <b>S10</b> |
| <b>3D roughness profile measurement for thickness of film .....</b>                                         | <b>S11</b> |
| <b>3D height profile and corresponding laser optical images of 4T based <math>\pi</math>-peptides .....</b> | <b>S14</b> |
| <b>AFM images of PDI based <math>\pi</math>-peptides with KCl characterization.....</b>                     | <b>S16</b> |
| <b>SEM/EDS images of PDI based <math>\pi</math>-peptides with KCl characterization .....</b>                | <b>S17</b> |
| <b>Brittleness of films shown representatively via VEVA-PDI .....</b>                                       | <b>S21</b> |
| <b>3D height profile and corresponding laser optical images of 4T based <math>\pi</math>-peptides .....</b> | <b>S22</b> |

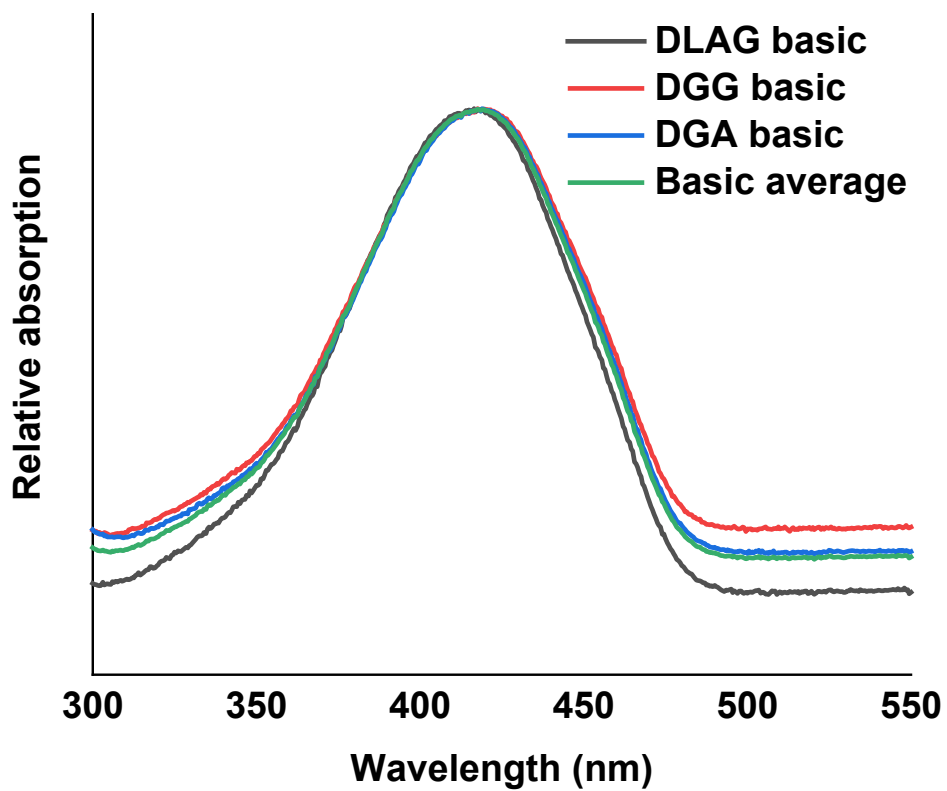

**Figure S1.** UV-vis absorption spectra for DGG-4T, DGA-4T, and DLAG-4T and their averages in basic medium after adding 15  $\mu\text{L}$  of 1M KOH.

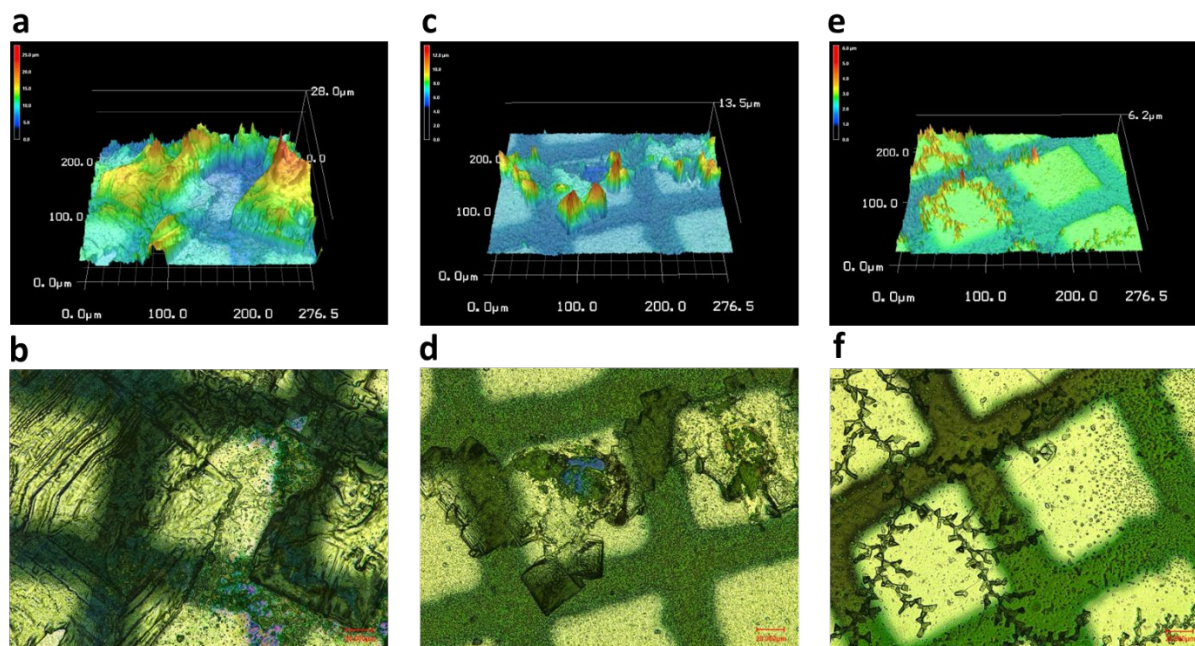

**Figure S2.** 3D height profile from laser optical microscopy scan of (a) DGG-4T with KCl at 50x magnification and its corresponding (b) 50x laser optical microscope image. 3D height profile from laser optical microscopy scan of (c) DGA-4T with KCl at 50x magnification and its corresponding (d) 50x laser optical microscope image. 3D height profile from laser optical microscopy scan of (e) DLAG-4T with KCl at 50x magnification and its corresponding (f) 50x laser optical microscope image.

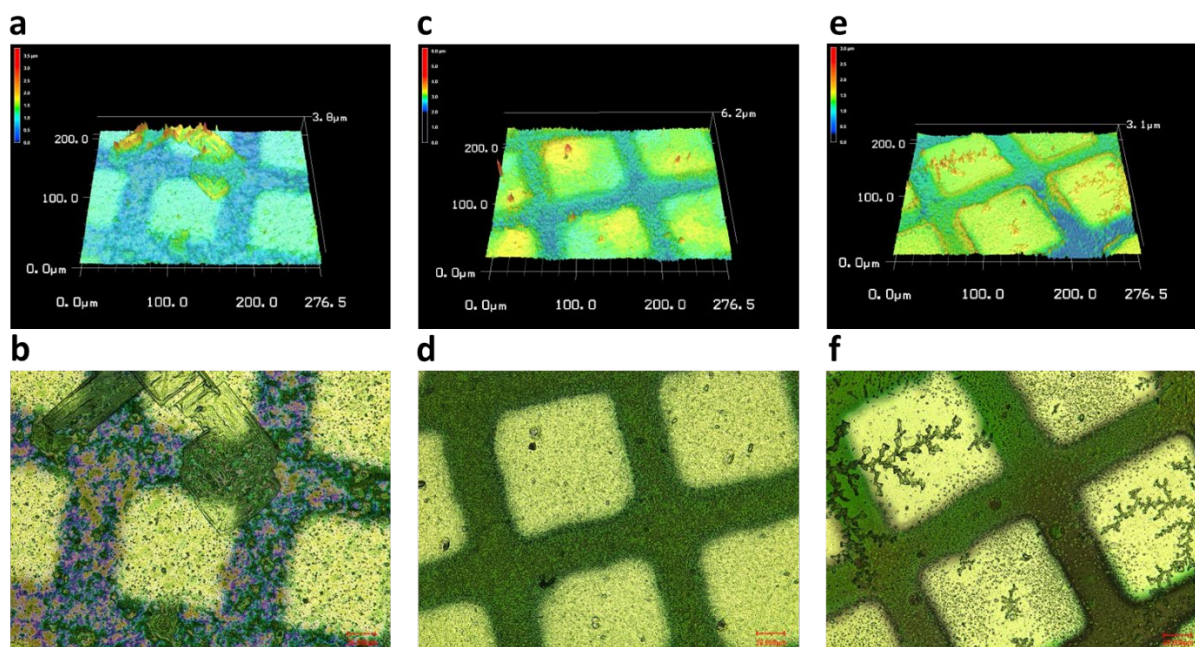

**Figure S3.** 3D height profile from laser optical microscopy scan of (a) DGG-4T without KCl at 50x magnification and its corresponding (b) 50x laser optical microscope image. 3D height profile from laser optical microscopy scan of (c) DGA-4T without KCl at 50x magnification and its corresponding (d) 50x laser optical microscope image. 3D height profile from laser

optical microscopy scan of (e) DLAG-4T without KCl at 50x magnification and its corresponding (f) 50x laser optical microscope image.

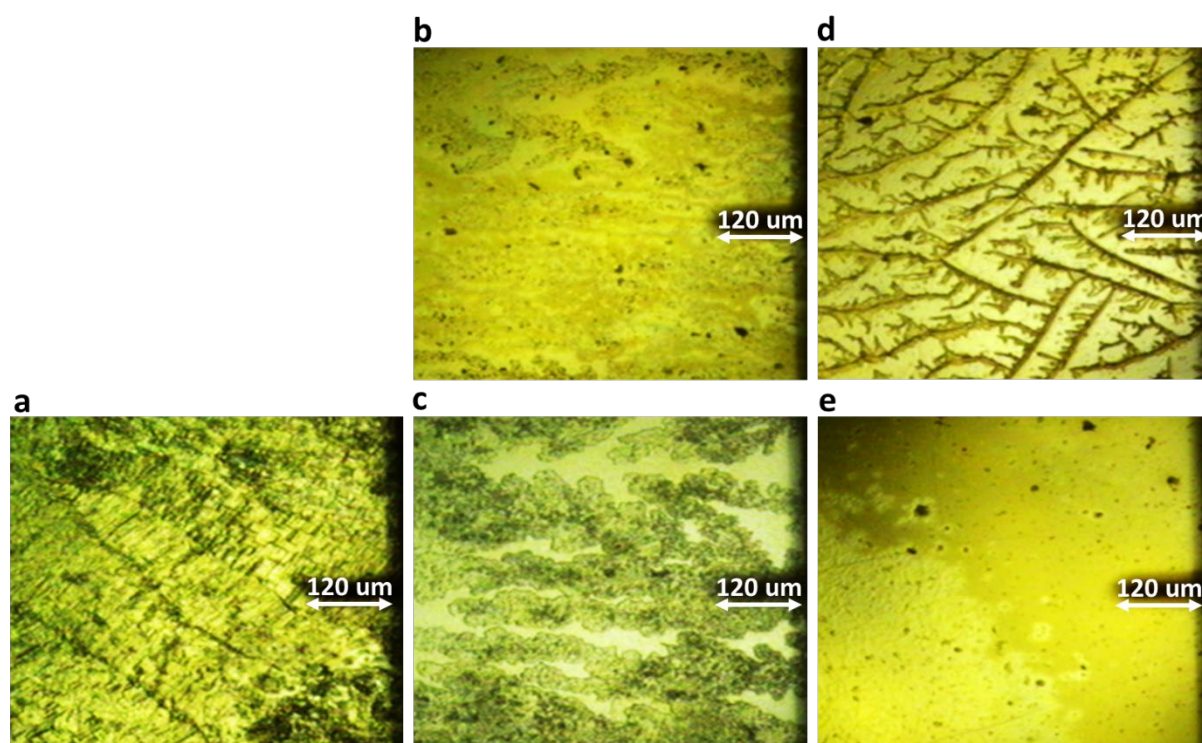

**Figure S4.** AFM images for (a) DGG-4T, (b) center of DGG-4T, (c) edge of DGG-4T, (d) center of DLAG-4T, and (e) edge of DLAG-4T.

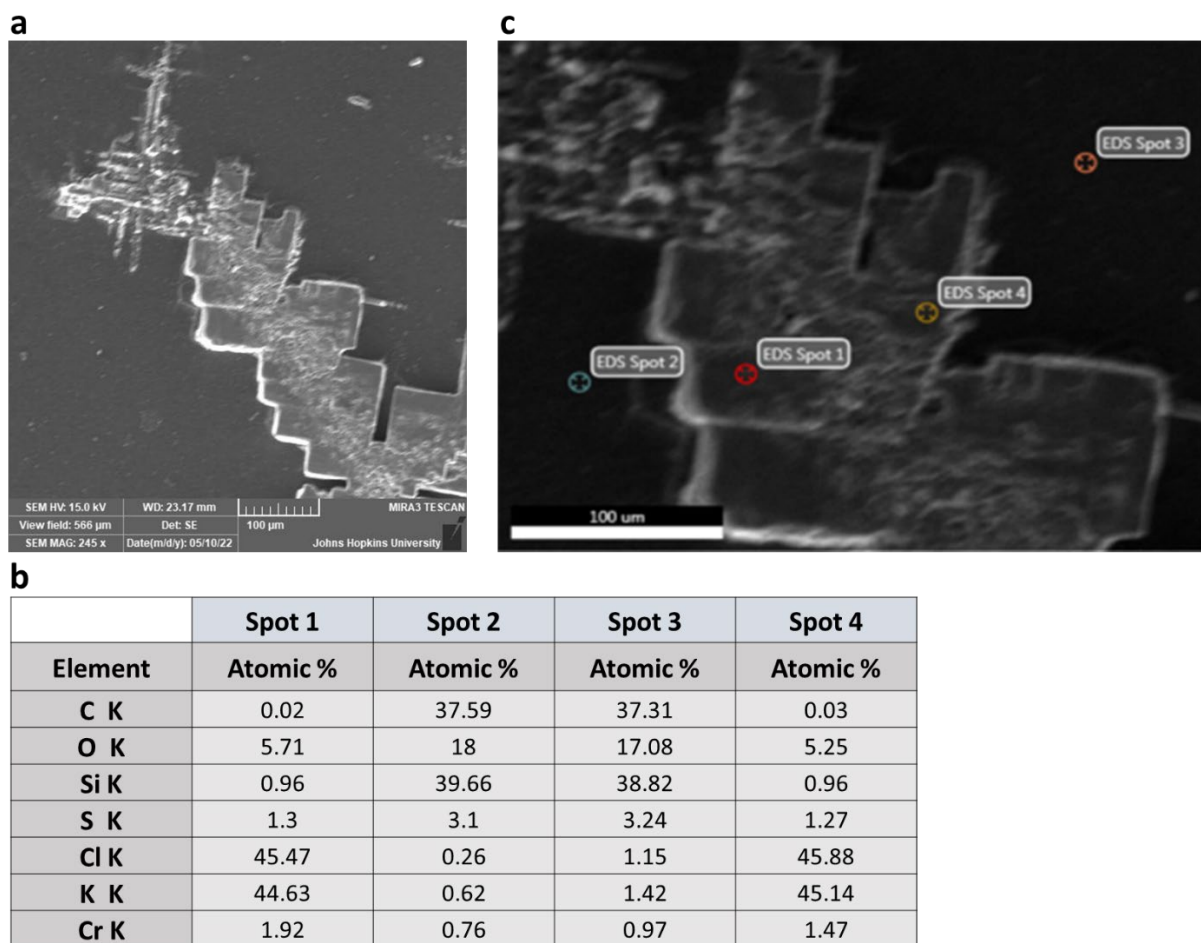

**Figure S5.** (a) SEM scan of DGG-4T at 245x magnification, (b) quantitative elemental composition analysis by SEM of EDS spots identified in (c), and (c) EDS scans from SEM for spots 1, 2, 3, and 4.

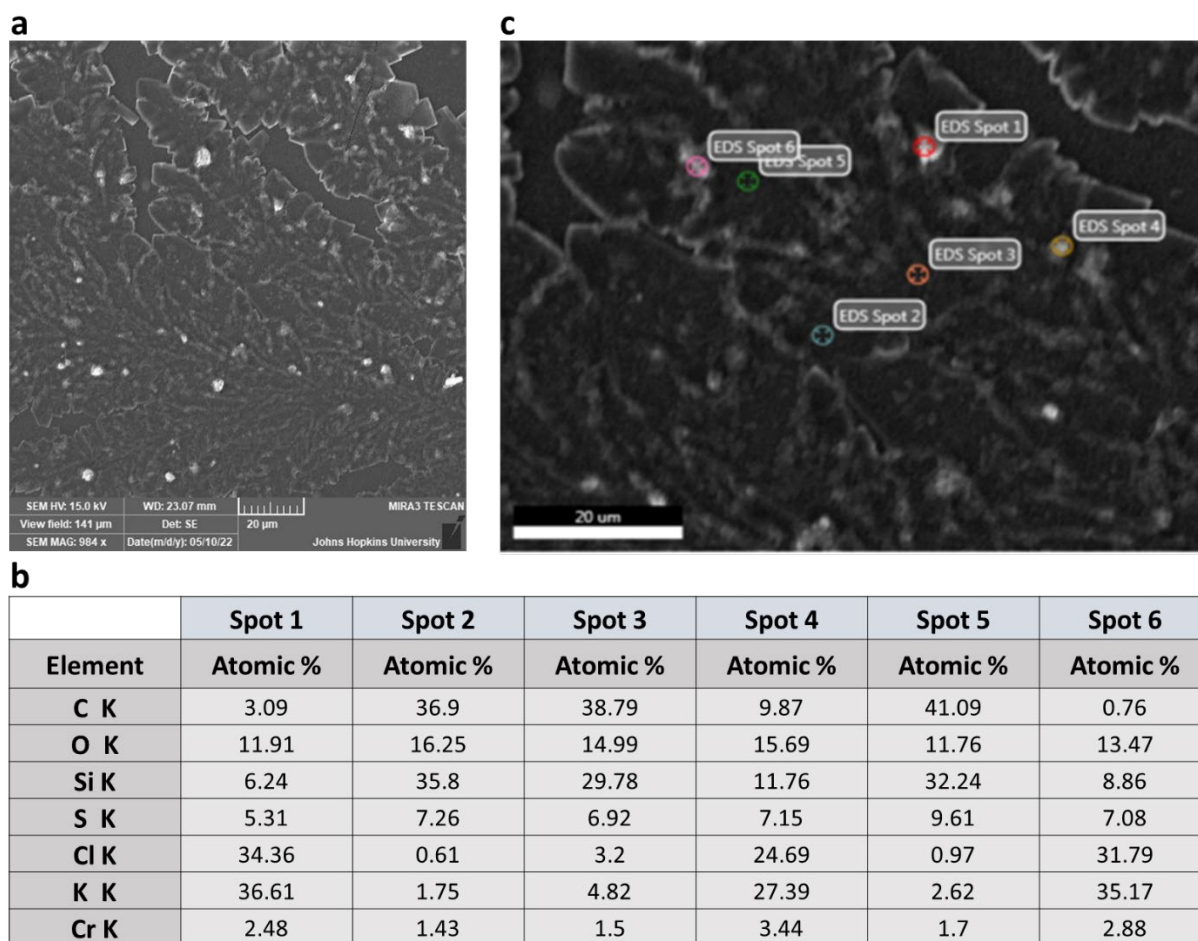

**Figure S6.** (a) SEM scan of DGG-4T at 984x magnification, (b) quantitative elemental composition analysis by SEM of EDS spots identified in (c), and (c) EDS scans from SEM for spots 1, 2, 3, 4, 5, and 6.

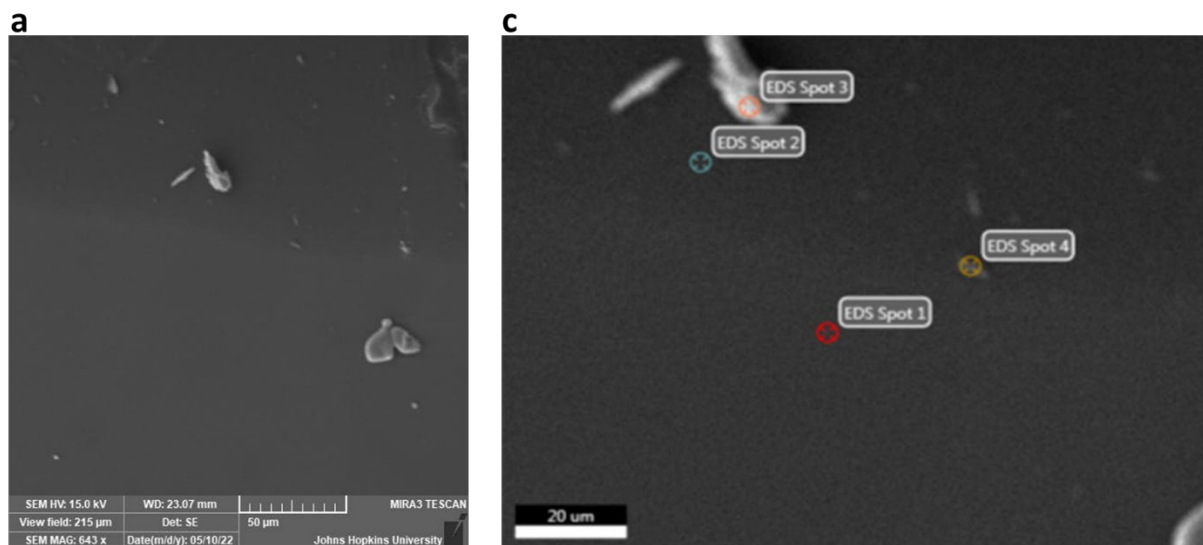

**b**

|         | Spot 1   | Spot 2   | Spot 3   | Spot 4   |
|---------|----------|----------|----------|----------|
| Element | Atomic % | Atomic % | Atomic % | Atomic % |
| C K     | 13.53    | 35.58    | 22.81    | 31.1     |
| O K     | 20.41    | 16.68    | 7.2      | 24.82    |
| Si K    | 64.81    | 45.33    | 68.45    | 41.16    |
| S K     | 0.15     | 1.26     | 0.69     | 1.22     |
| Cl K    | 0.05     | 0.09     | 0.1      | 0.21     |
| K K     | 0.04     | 0.2      | 0.12     | 0.3      |
| Cr K    | 1.01     | 0.86     | 0.63     | 1.18     |

**Figure S7.** (a) SEM scan of DGG-4T at 643x magnification, (b) quantitative elemental composition analysis by SEM of EDS spots identified in (c), (c) EDS scans from SEM for spots 1, 2, 3, and 4.

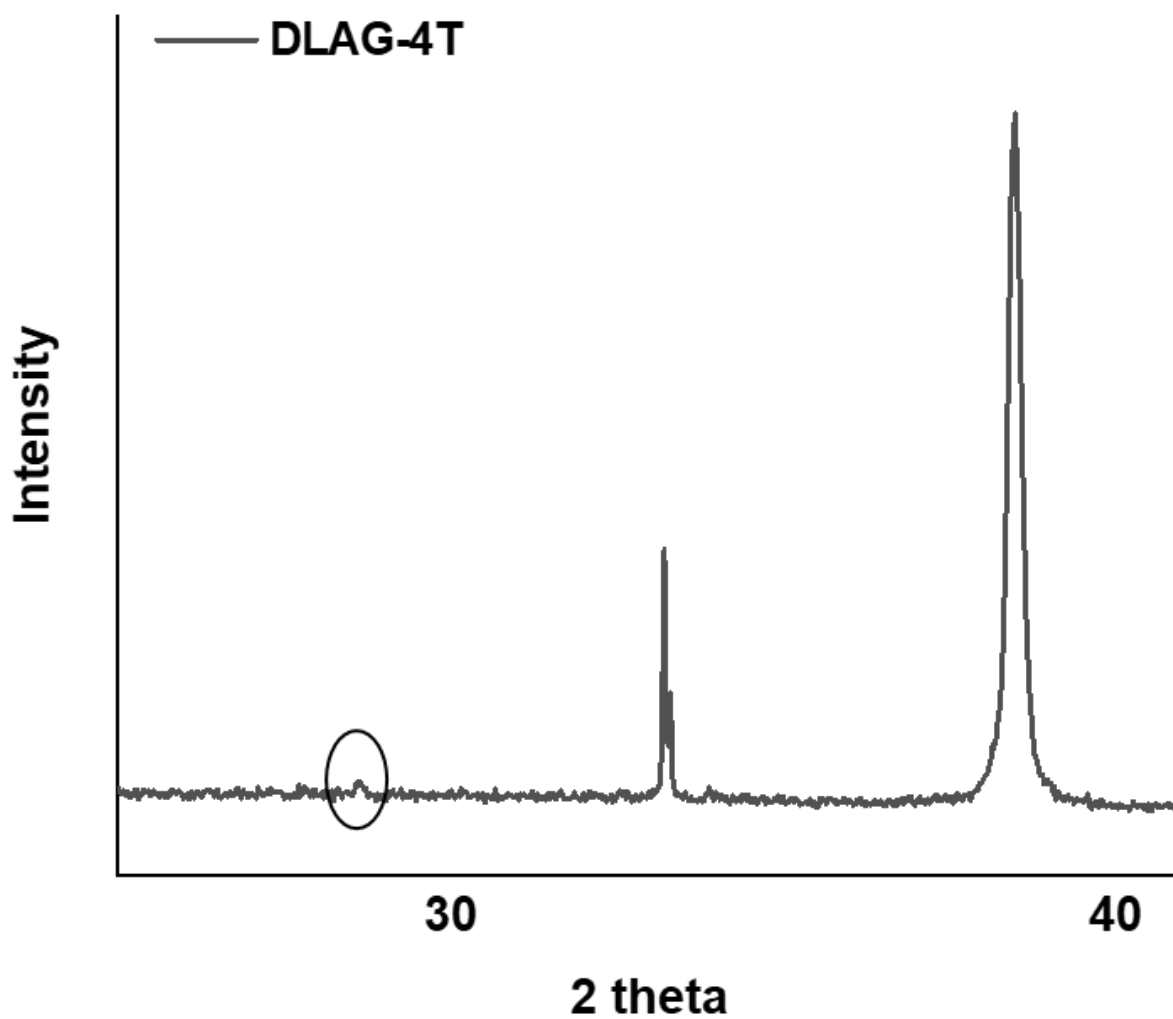

**Figure S8.** Zoomed in XRD graph of DLAG from **figure 6**. Showing the small KCl XRD peak in DLAG-4T due to less formation of bulk KCl crystals resulting in less KCl crystal planes diffracting X-ray beams from XRD.



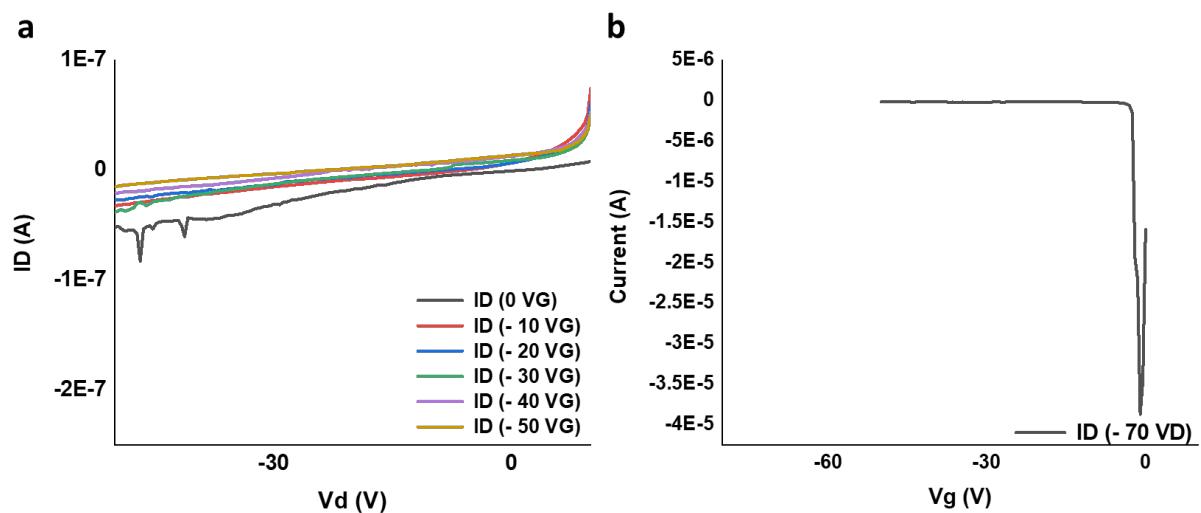

**Figure S9.** (a) Transfer curves of DGG-4T OFET measurements showing no semiconducting properties and (b) output curve of DGG-4T OFET measurement showing no semiconducting properties.

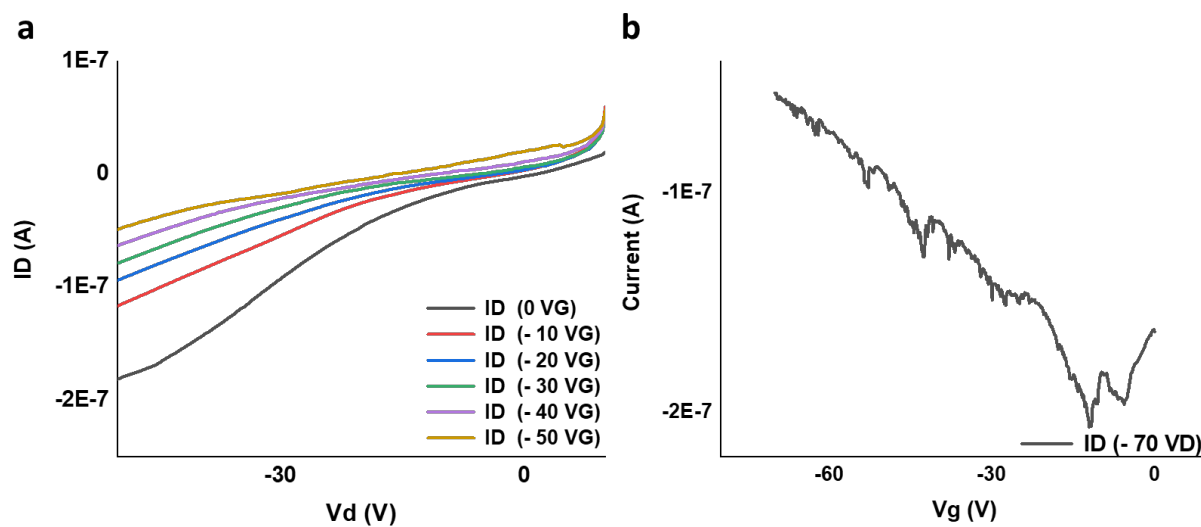

**Figure S10.** (a) Transfer curves of DGA-4T OFET measurements showing no semiconducting properties and (b) output curve of DGA-4T OFET measurement showing no semiconducting properties.

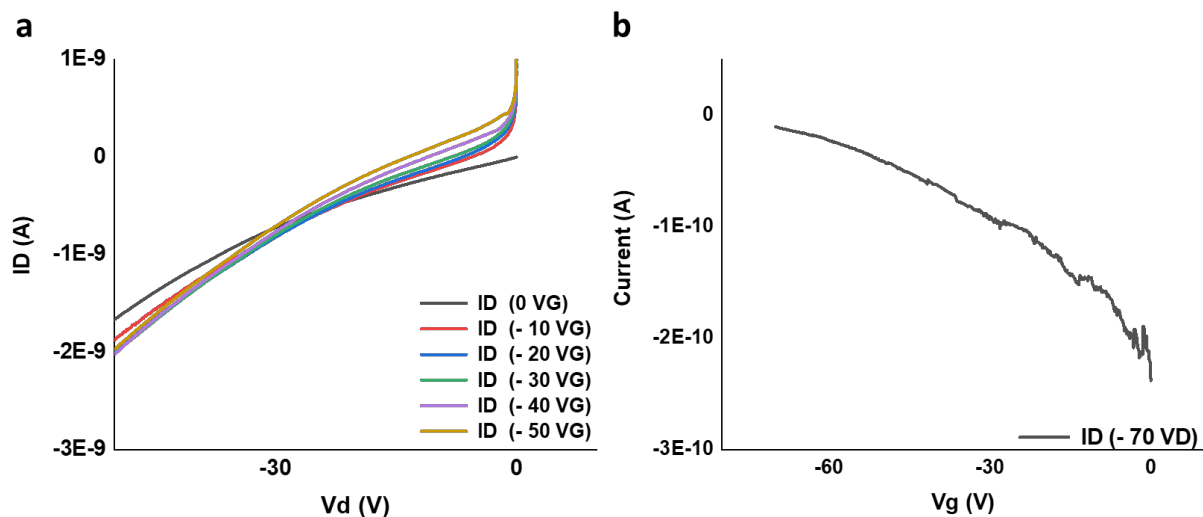

**Figure S11.** (a) Transfer curves of DLAG-4T OFET measurements showing no semiconducting properties and (b) output curve of DLAG-4T OFET measurement showing no semiconducting properties.

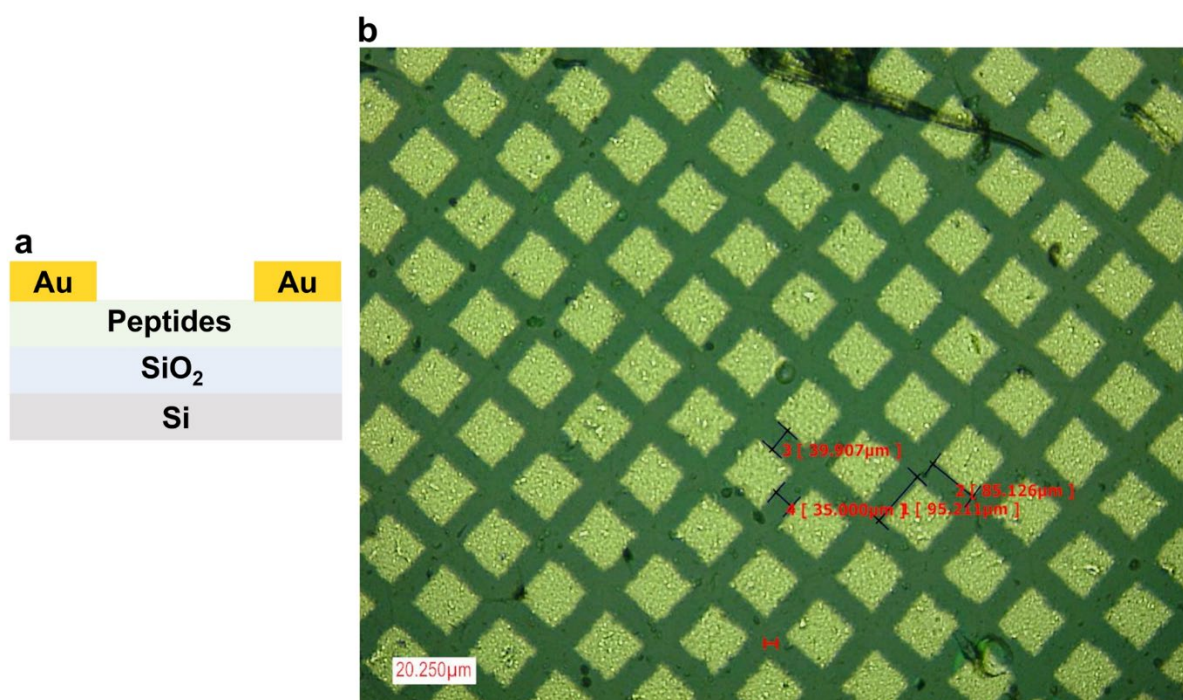

**Figure S12.** (a) OFET device structure of all OFET measurements for figure S7-10. (b) Laser optical microscope image of dimensions on the surface of OFET device after thermally evaporating 50 nm of gold electrode using a TEM grid mask.

a

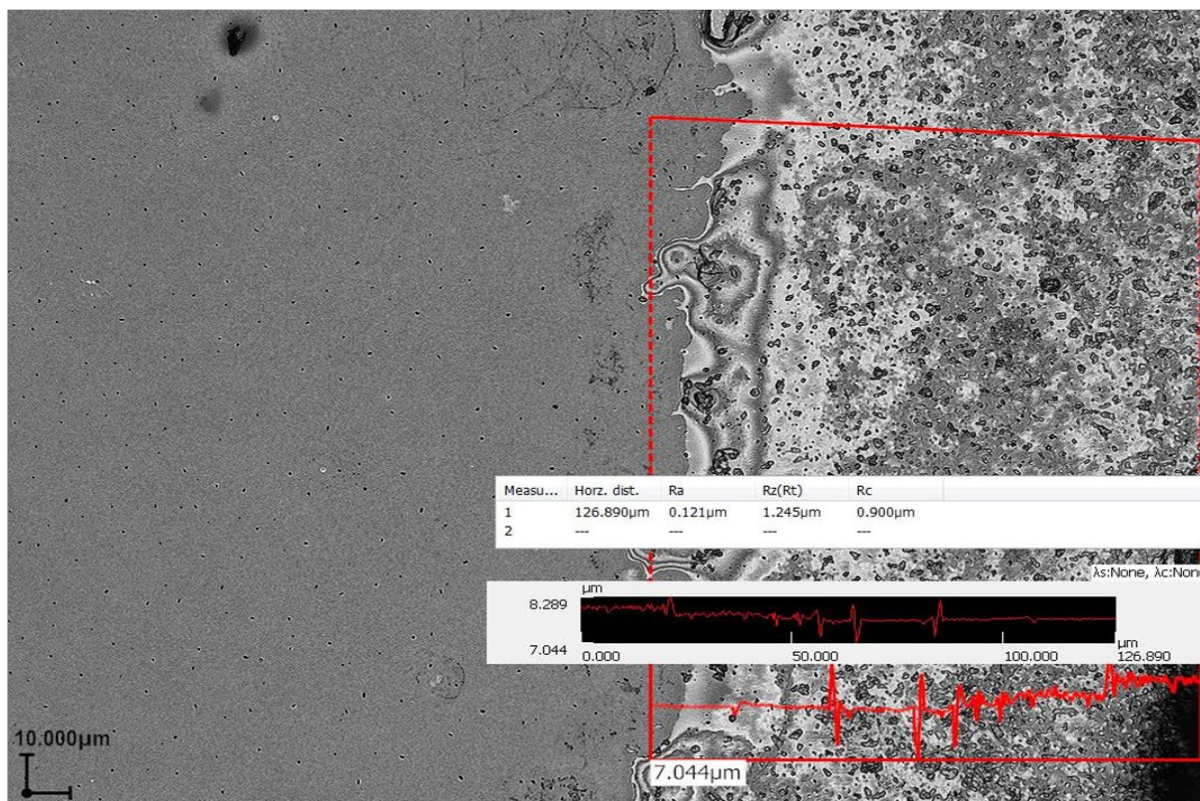

b

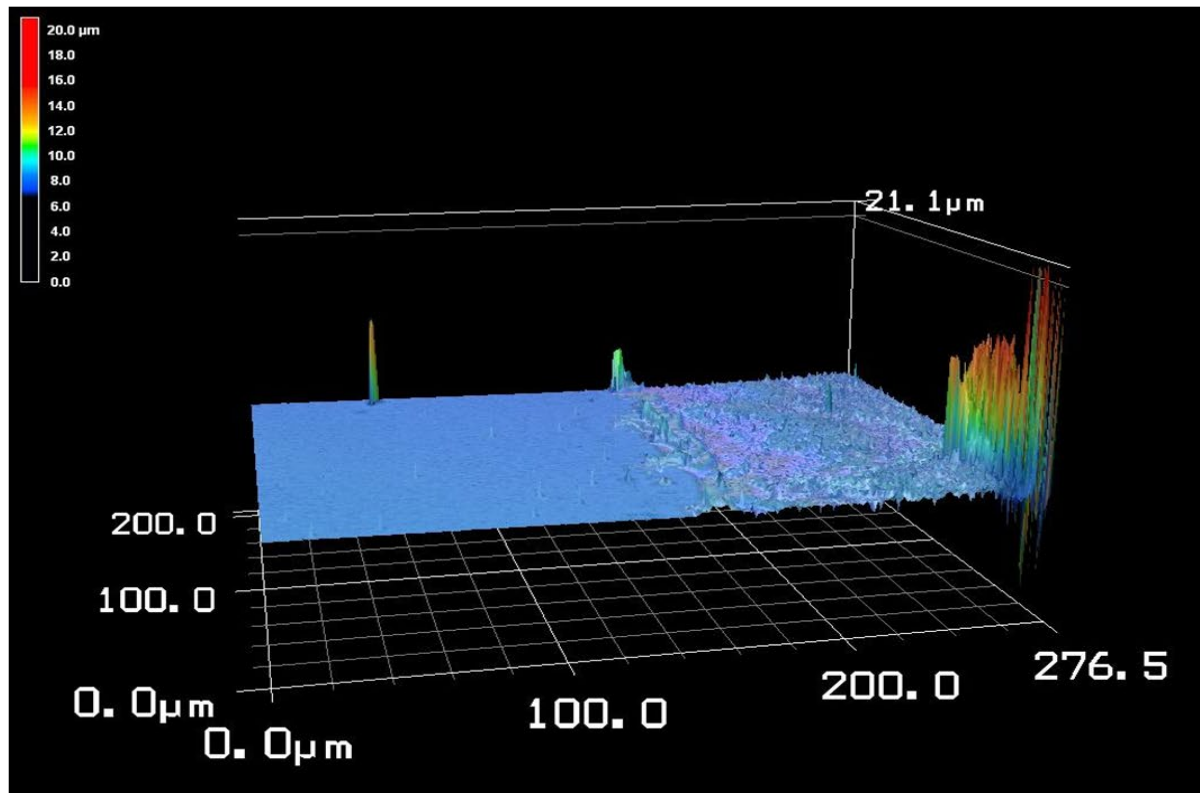

**Figure S13.** (a) Surface roughness profiling of laser scanned region at the edge of DGG-4T thin film on Si substrate and (b) 3D height profile image of same area for thickness.

a

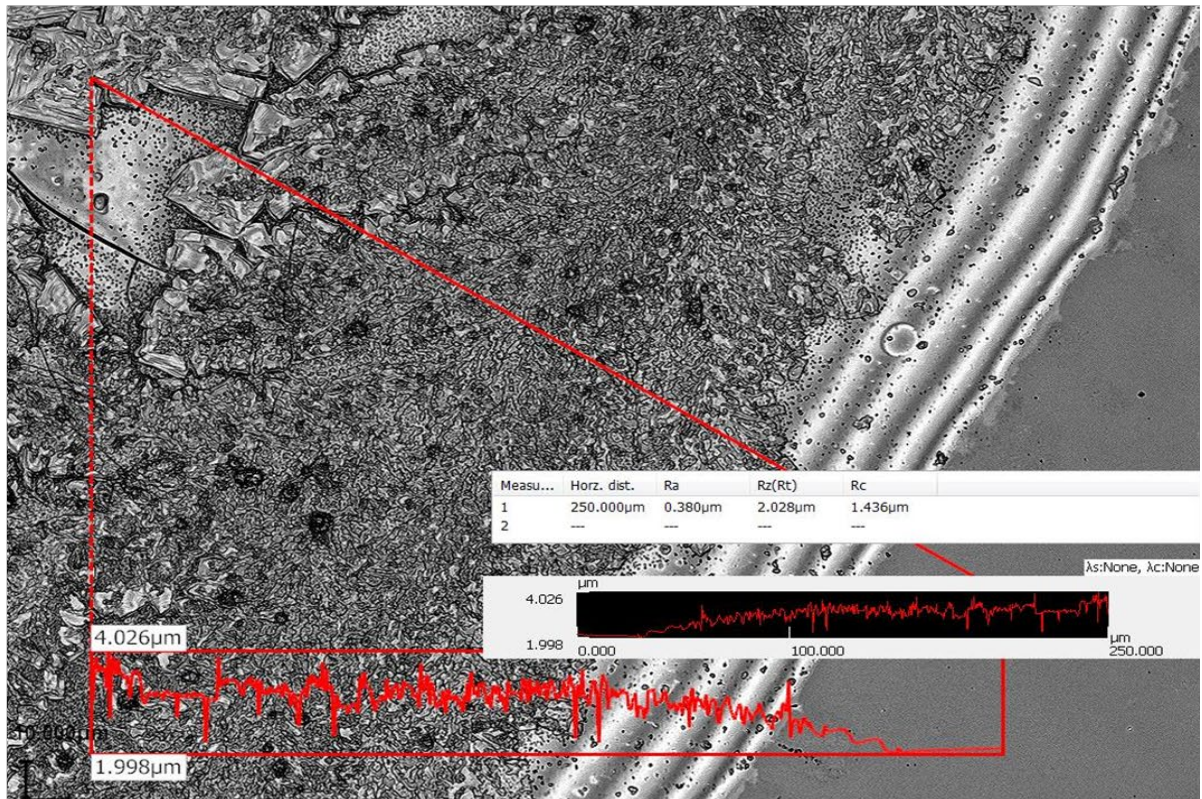

b

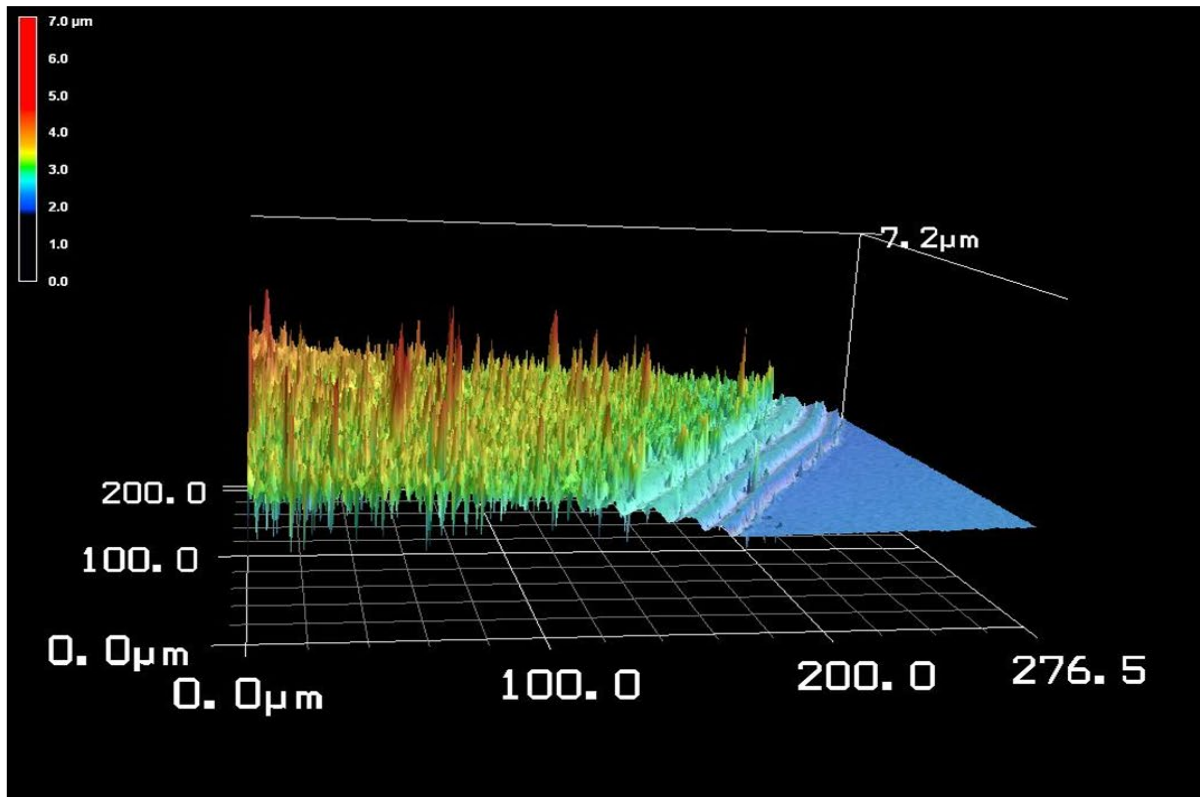

**Figure S14.** (a) Surface roughness profiling of laser scanned region at the edge of DGA-4T thin film on Si substrate and (b) 3D height profile image of same area for thickness.

a

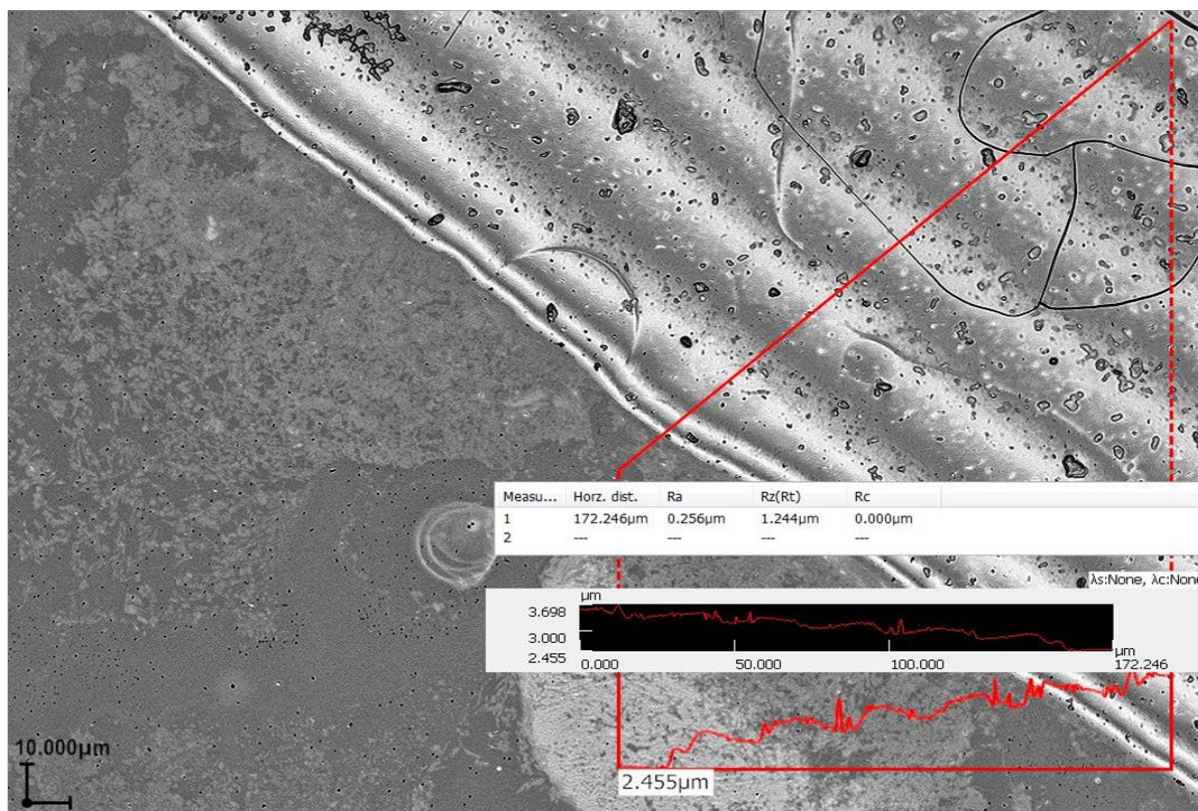

b

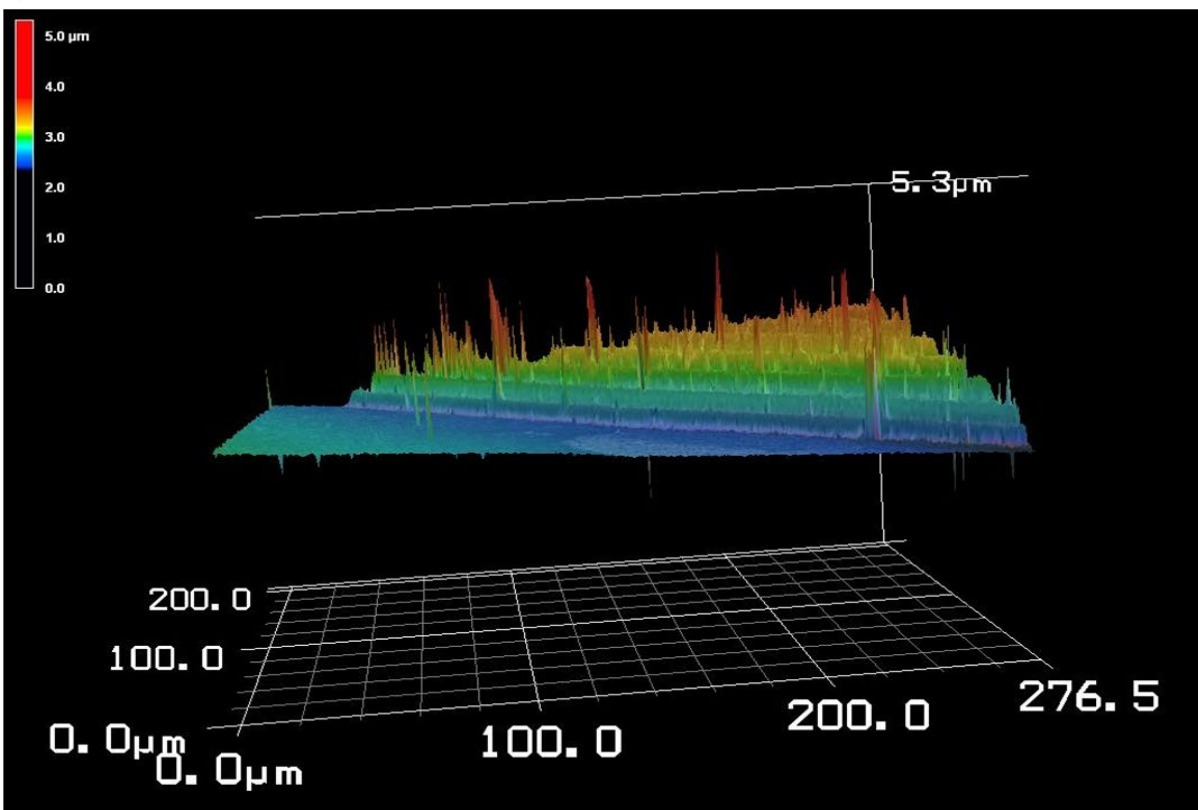

**Figure S15.** (a) Surface roughness profiling of laser scanned region at the edge of DLAG-4T thin film on Si substrate and (b) 3D height profile image of same area for thickness.

**a**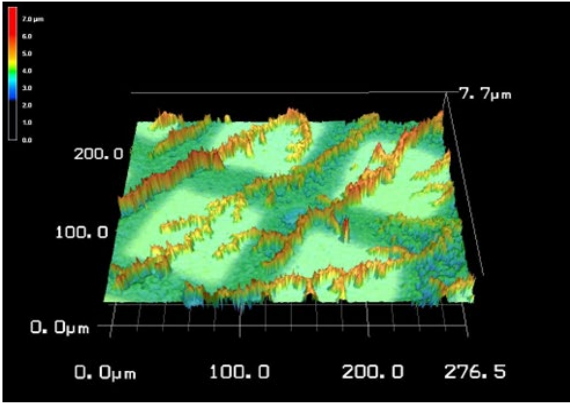**c**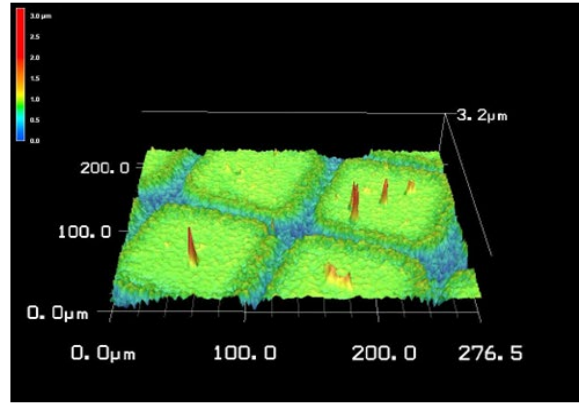**b**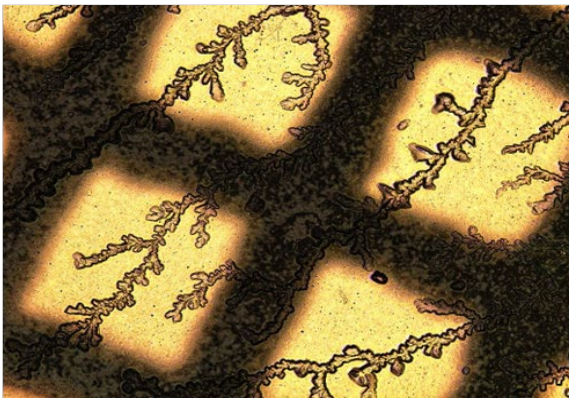**d**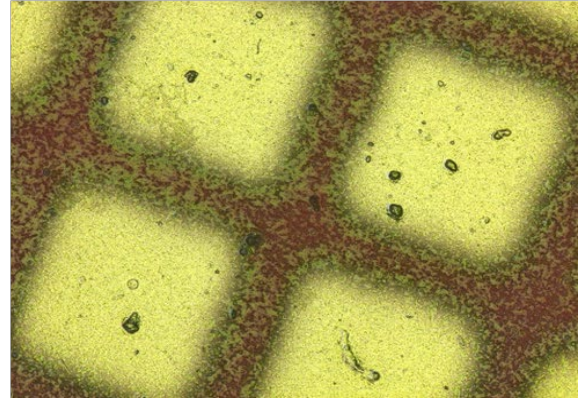**e**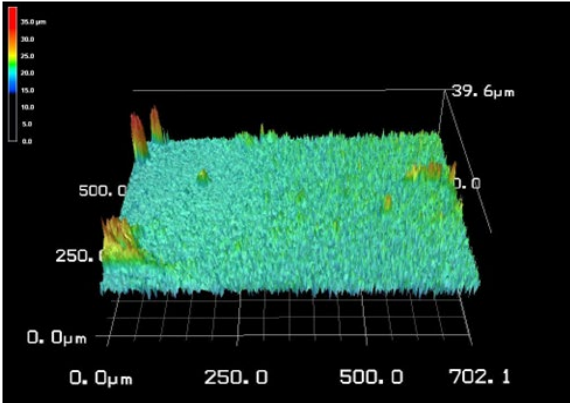**g**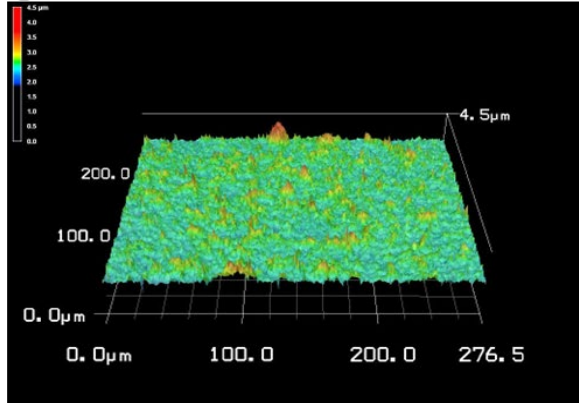**f**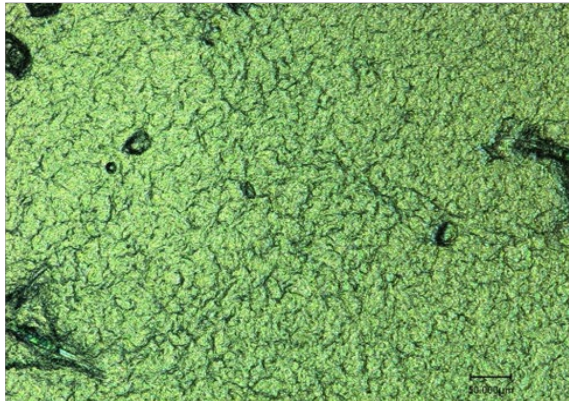**h**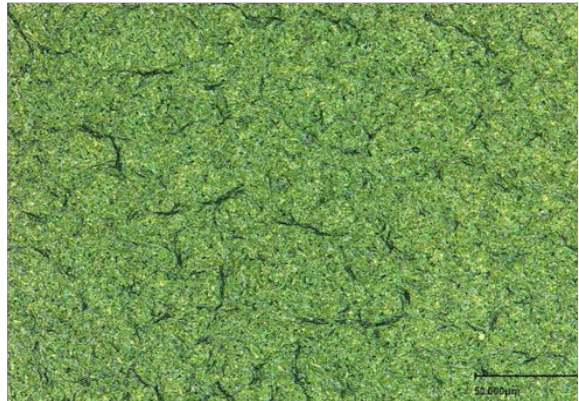

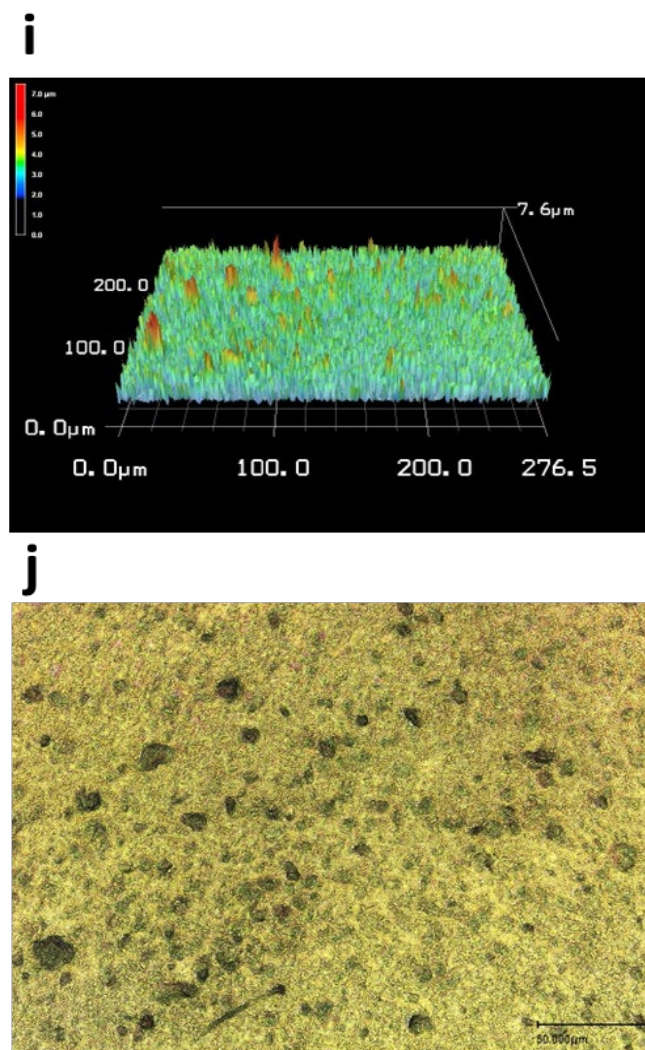

**Figure S16.** 3D height profile from laser optical microscopy scan of **(a)** VEVAG-PDI with KCl at 50x magnification and its corresponding **(b)** 50x laser optical microscope image. 3D height profile from laser optical microscopy scan of **(c)** VEVA-A-PDI at 50x magnification and its corresponding **(d)** 50x laser optical microscope image. 3D height profile from laser optical microscopy scan of **(e)** DVAG-PDI without KCl at 50x magnification and its corresponding **(f)** 50x laser optical microscope image. 3D height profile from laser optical microscopy scan of **(g)** DVAG-PDI with KCl at 50x magnification and its corresponding **(h)** 50x laser optical microscope image. 3D height profile from laser optical microscopy scan of **(i)** DAIA-PDI at 50x magnification and its corresponding **(j)** 50x laser optical microscope image.

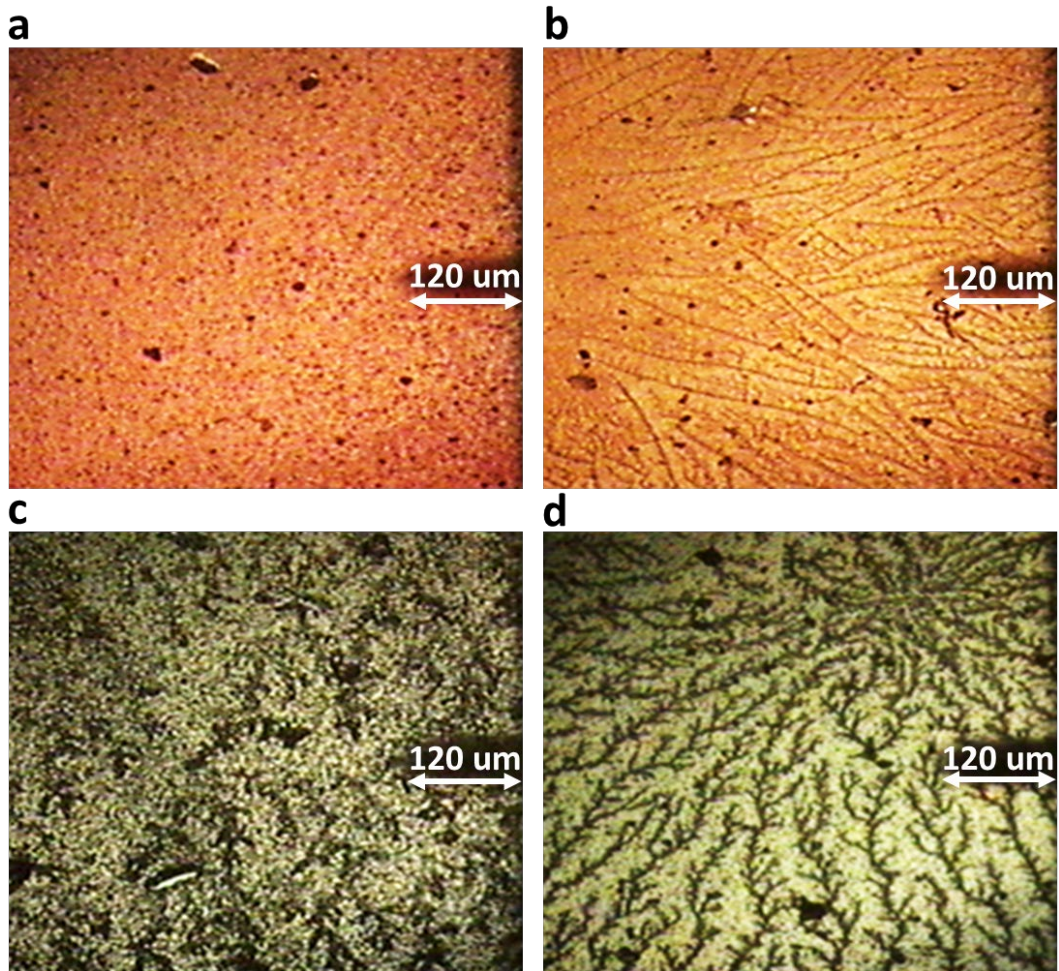

**Figure S17.** AFM images for (a) DAIA-PDI, (b) DVAG-PDI, (c) VEVAA-PDI, and (d) VEVAG-PDI.



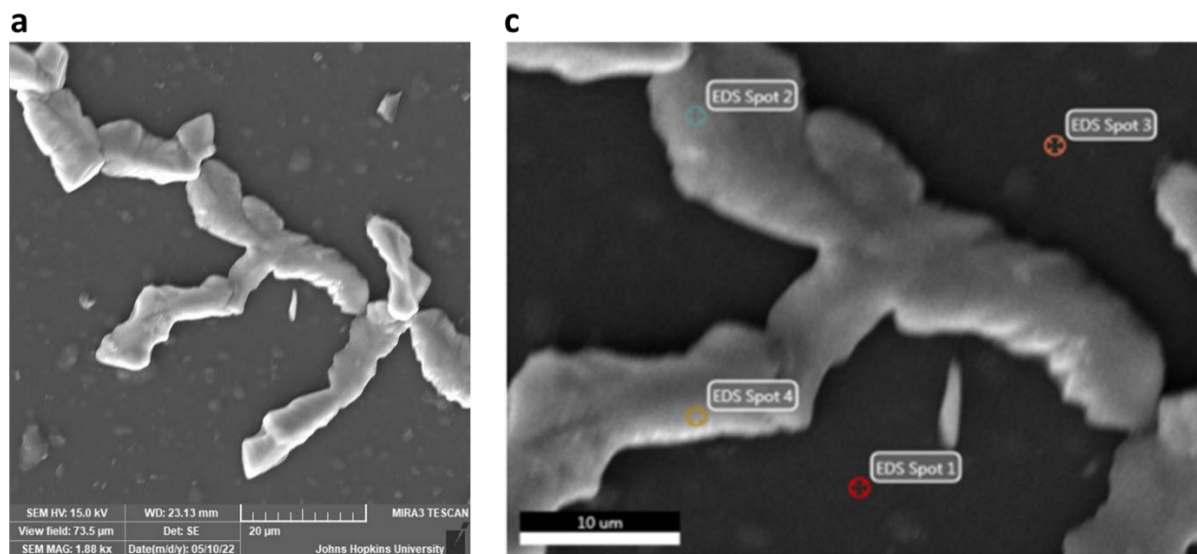

**b**

|         | Spot 1   | Spot 2   | Spot 3   | Spot 4   |
|---------|----------|----------|----------|----------|
| Element | Atomic % | Atomic % | Atomic % | Atomic % |
| C K     | 40.69    | 0.03     | 36.66    | 2.17     |
| O K     | 15.61    | 8.93     | 16.29    | 13       |
| Si K    | 42.2     | 2.35     | 45.22    | 2.09     |
| Cl K    | 0.38     | 43.36    | 0.47     | 39.62    |
| K K     | 0.31     | 43.5     | 0.39     | 41.13    |
| Cr K    | 0.8      | 1.83     | 0.96     | 1.99     |

**Figure S18.** (a) SEM scan of VEVAG-PDI at 1.88kx magnification, (b) quantitative elemental composition analysis by SEM of EDS spots identified in (c), (c) EDS scans from SEM for spots 1, 2, 3, and 4.

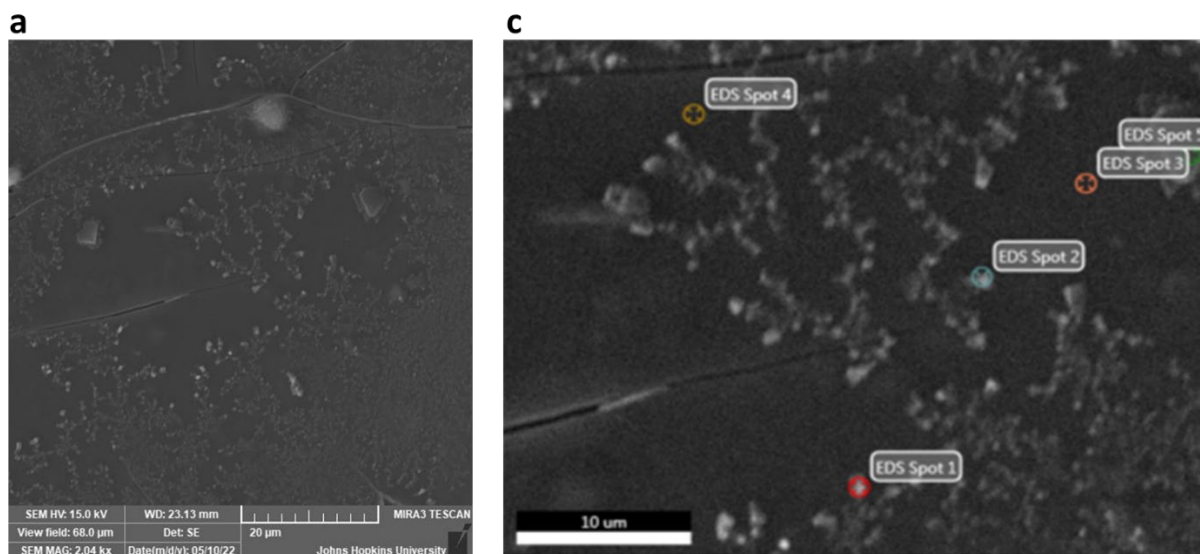

**b**

|         | Spot 1   | Spot 2   | Spot 3   | Spot 4   | Spot 5   |
|---------|----------|----------|----------|----------|----------|
| Element | Atomic % |
| C K     | 39.47    | 33.78    | 41.4     | 43.18    | 25.25    |
| O K     | 13.85    | 13.01    | 14.25    | 14.11    | 12.39    |
| Si K    | 40.54    | 48.94    | 42.95    | 41.4     | 45.7     |
| Cl K    | 2.36     | 1.58     | 0.34     | 0.38     | 8        |
| K K     | 2.54     | 1.65     | 0.25     | 0.2      | 7.37     |
| Cr K    | 1.23     | 1.04     | 0.8      | 0.73     | 1.3      |

**Figure S19.** (a) SEM scan of VEVAA-PDI at 2.04kx magnification, (b) quantitative elemental composition analysis by SEM of EDS spots identified in (c), (c) EDS scans from SEM for spots 1, 2, 3, 4, and 5.

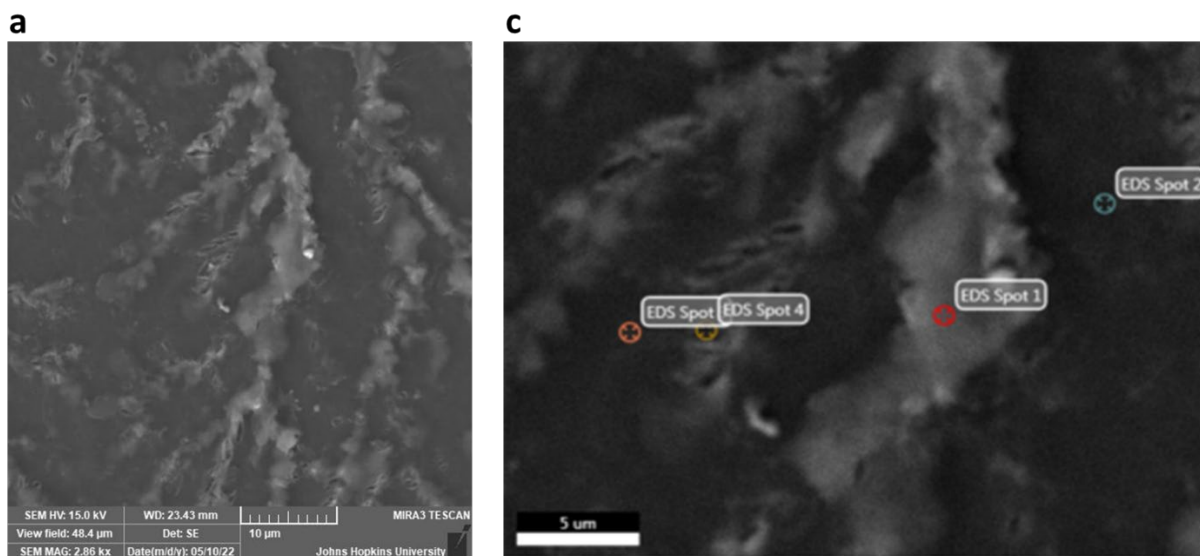

**b**

|         | Spot 1   | Spot 2   | Spot 3   | Spot 4   |
|---------|----------|----------|----------|----------|
| Element | Atomic % | Atomic % | Atomic % | Atomic % |
| C K     | 18.46    | 29.24    | 30.28    | 28.2     |
| O K     | 16.97    | 15.79    | 18.65    | 15.06    |
| Si K    | 21.1     | 53.58    | 49.76    | 55.14    |
| Cl K    | 20.89    | 0.27     | 0.31     | 0.43     |
| K K     | 21.54    | 0.38     | 0.35     | 0.45     |
| Cr K    | 1.04     | 0.74     | 0.64     | 0.71     |

**Figure S20.** (a) SEM scan of DAVG-PDI at 2.86kx magnification, (b) quantitative elemental composition analysis by SEM of EDS spots identified in (c), (c) EDS scans from SEM for spots 1, 2, 3, and 4.

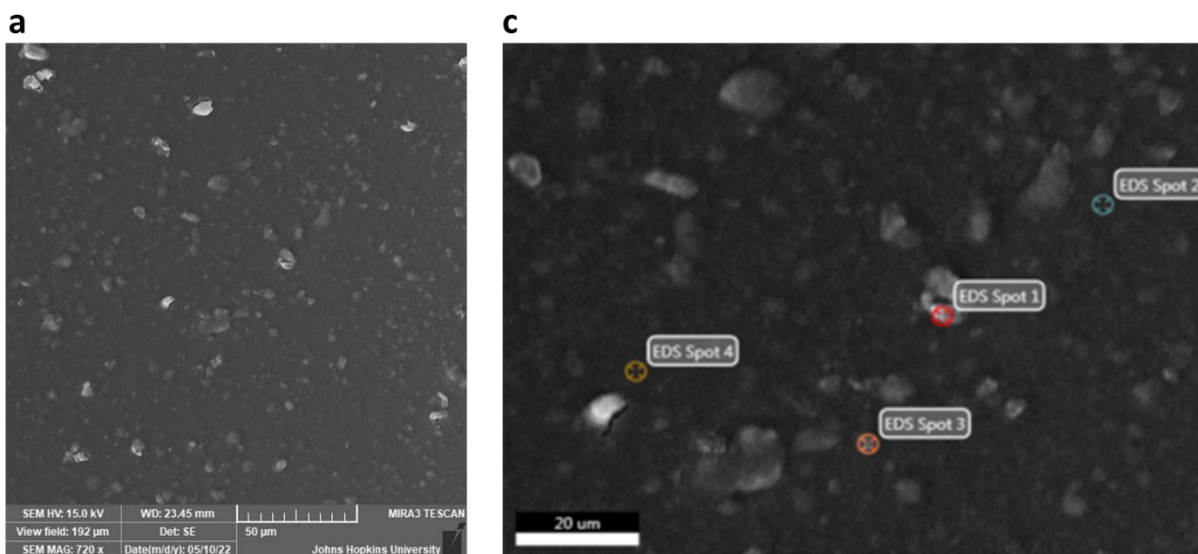

**b**

|         | Spot 1   | Spot 2   | Spot 3   | Spot 4   |
|---------|----------|----------|----------|----------|
| Element | Atomic % | Atomic % | Atomic % | Atomic % |
| C K     | 52.03    | 46       | 52.05    | 52.94    |
| O K     | 22.31    | 11.74    | 13.88    | 11.67    |
| Si K    | 23.82    | 41.03    | 32.53    | 34.22    |
| Cl K    | 0.39     | 0.29     | 0.36     | 0.27     |
| K K     | 0.2      | 0.18     | 0.23     | 0.2      |
| Cr K    | 1.25     | 0.76     | 0.95     | 0.7      |

**Figure S21.** (a) SEM scan of DAVG-PDI at 2.86kx magnification, (b) quantitative elemental composition analysis by SEM of EDS spots identified in (c), (c) EDS scans from SEM for spots 1, 2, 3, and 4.

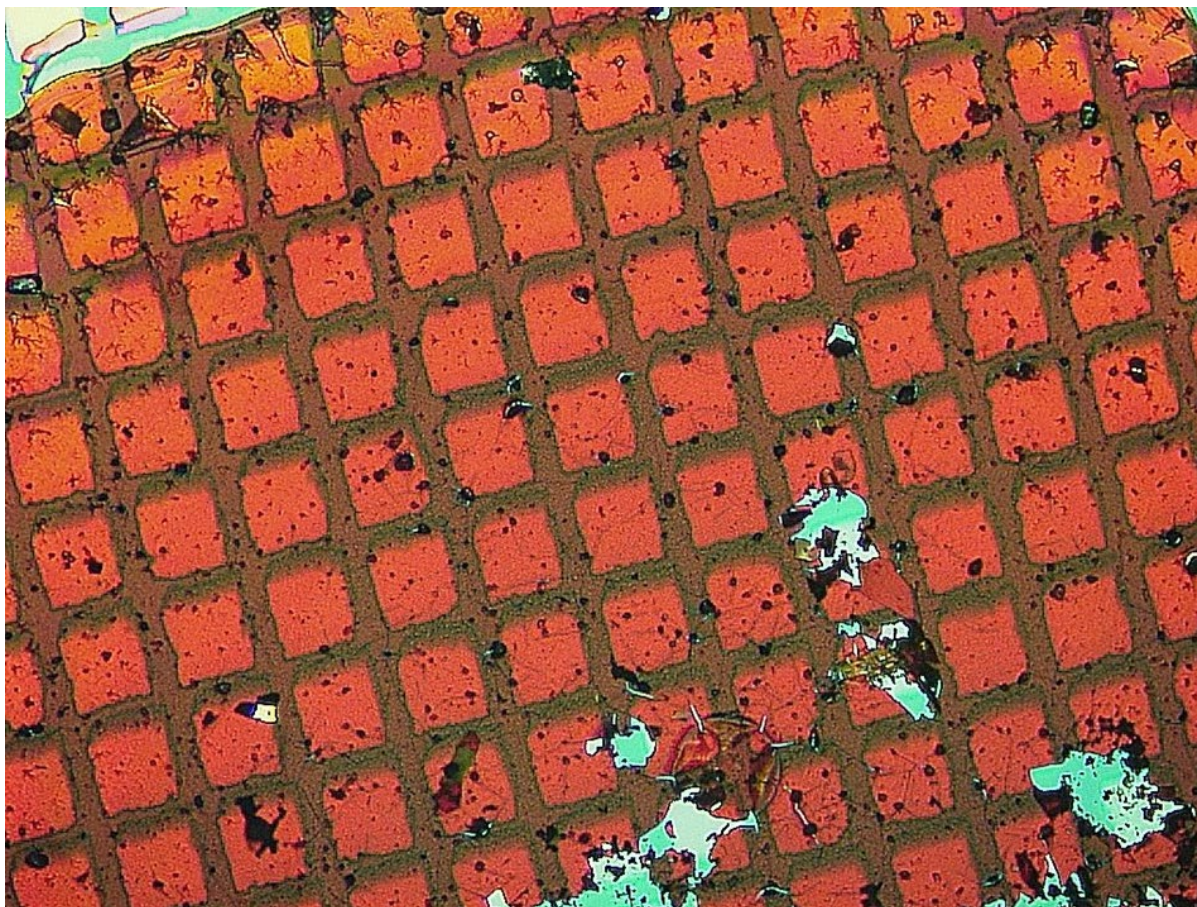

**Figure S22.** Representative image of VEVA-PDI showing brittleness of  $\pi$ -peptides with alanine amino acid closest to the PDI cores resulting in thin films shattering upon contact with probe tip for electrical measurements.

**a**

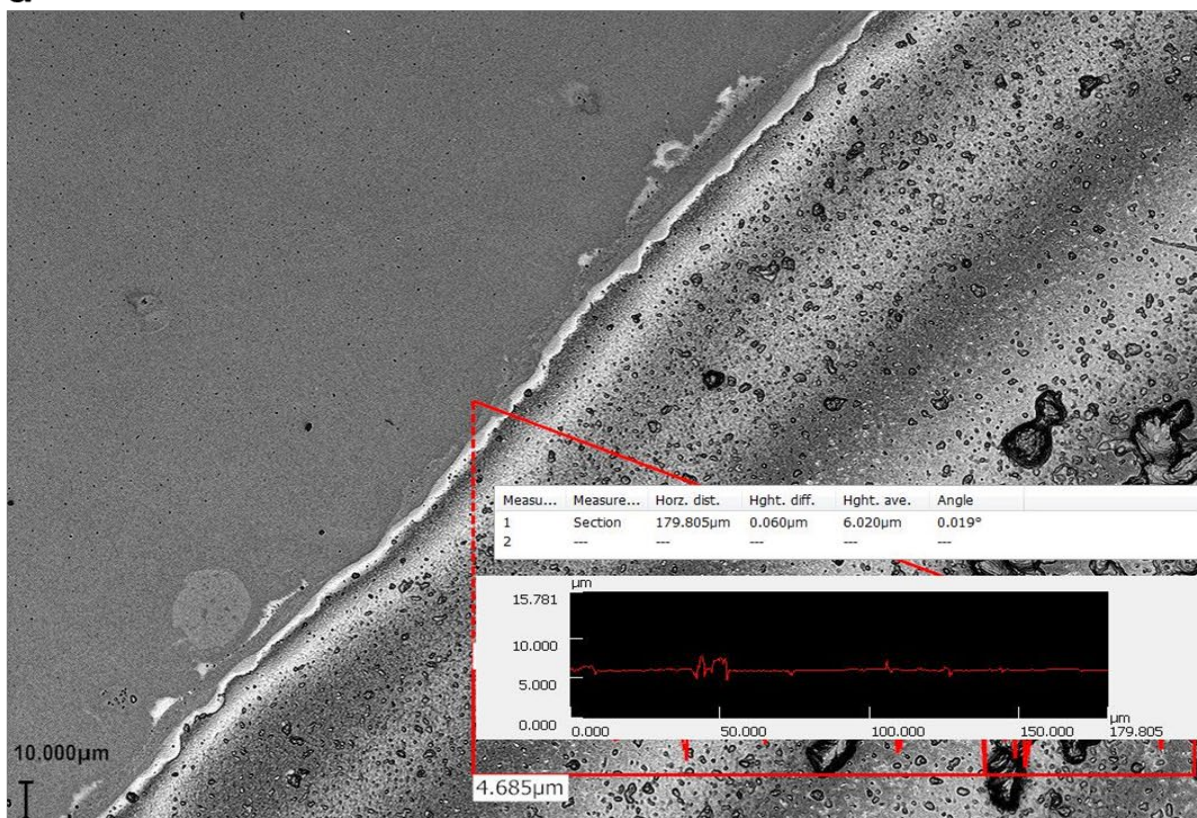

**b**

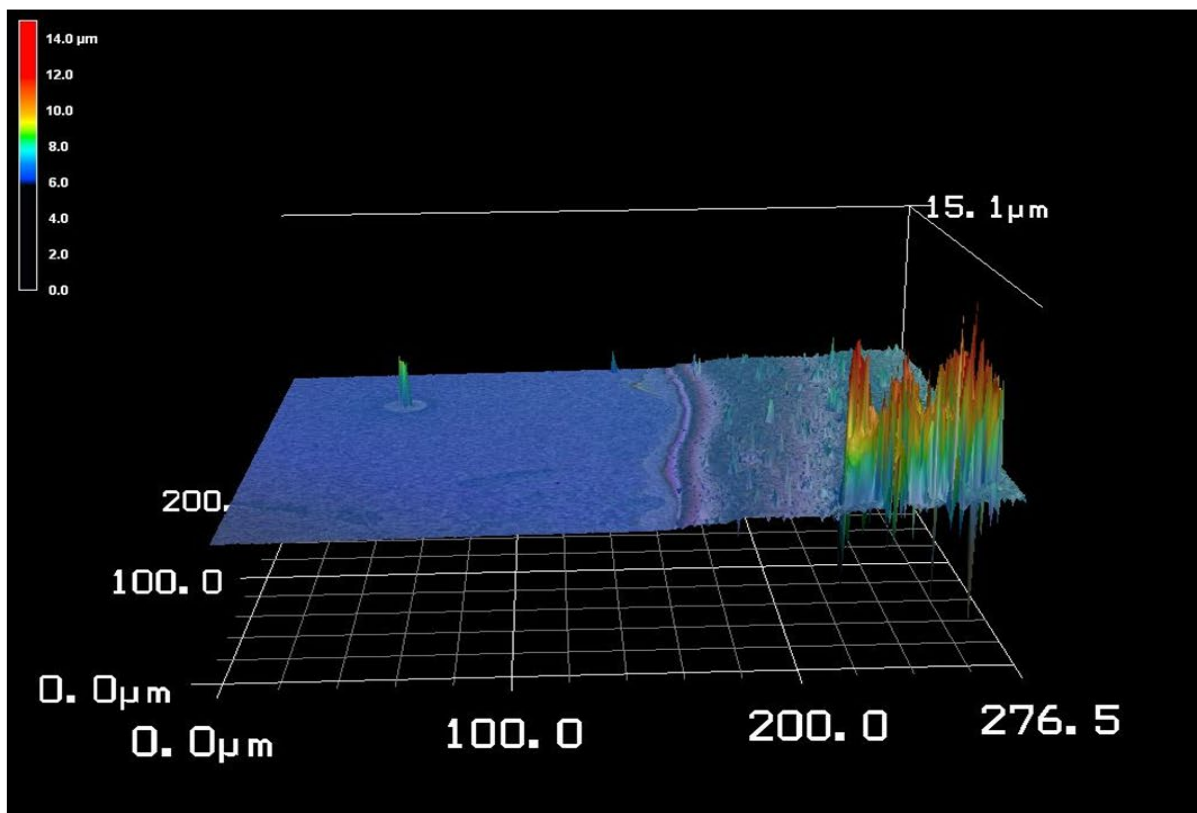

**Figure S23.** (a) Surface roughness profiling of laser scanned region at the edge of VEVAG-PDI thin film on Si substrate and (b) 3D height profile image of same area for thickness.

**a**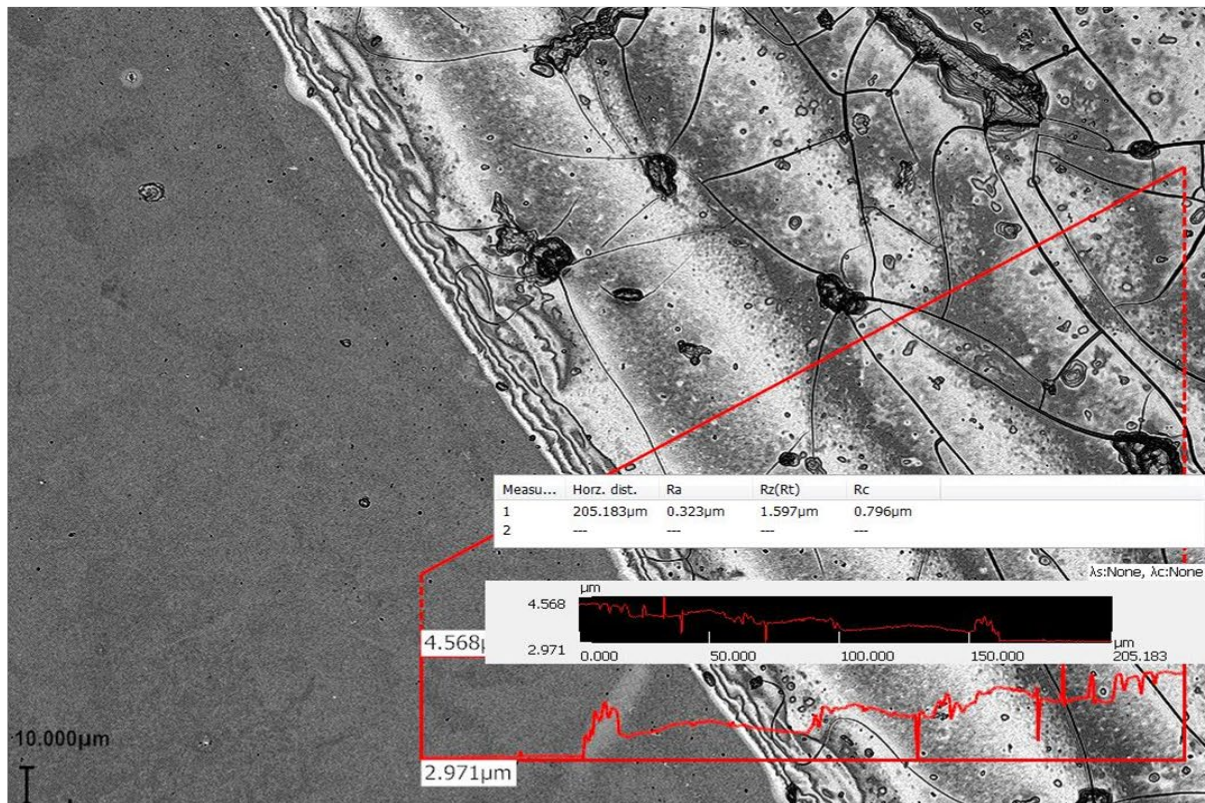**b**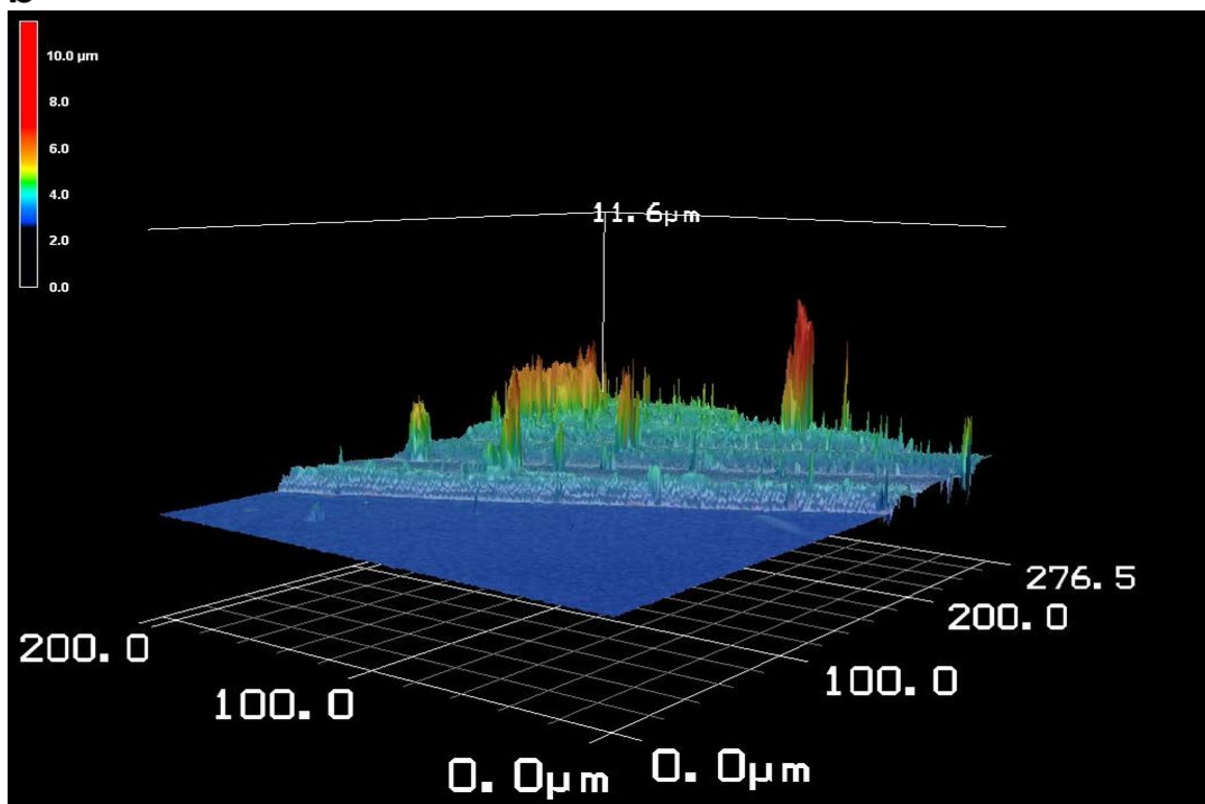

**Figure S24.** (a) Surface roughness profiling of laser scanned region at the edge of VEVA-PDI thin film on Si substrate and (b) 3D height profile image of same area for thickness.

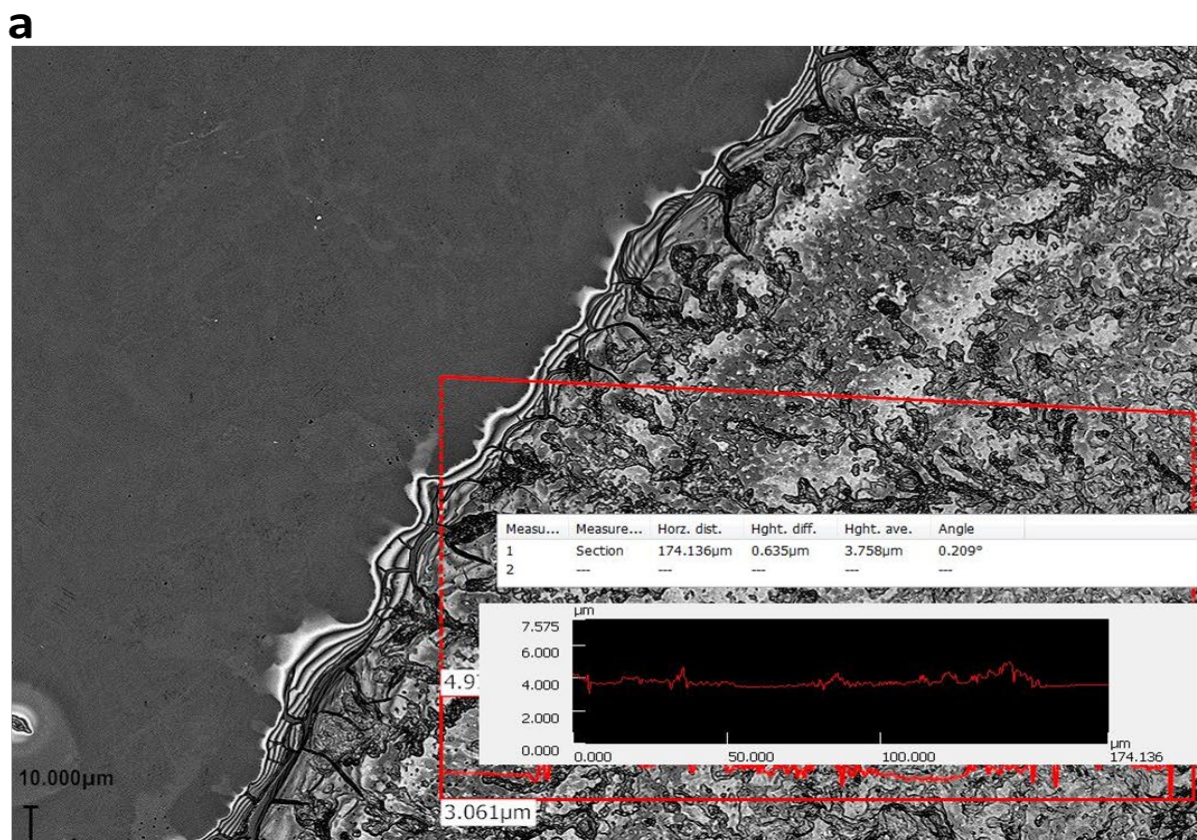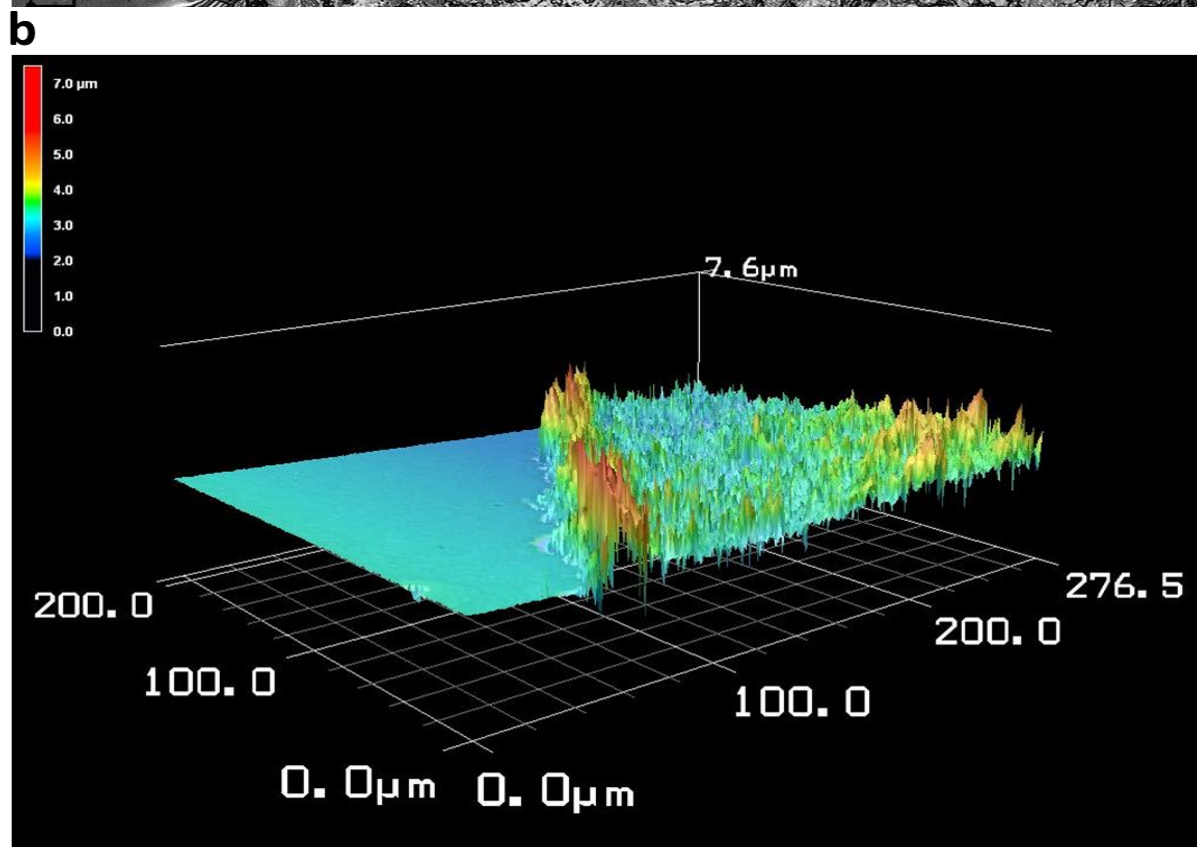

**Figure S25.** (a) Surface roughness profiling of laser scanned region at the edge of DAVG-PDI thin film on Si substrate and (b) 3D height profile image of same area for thickness.



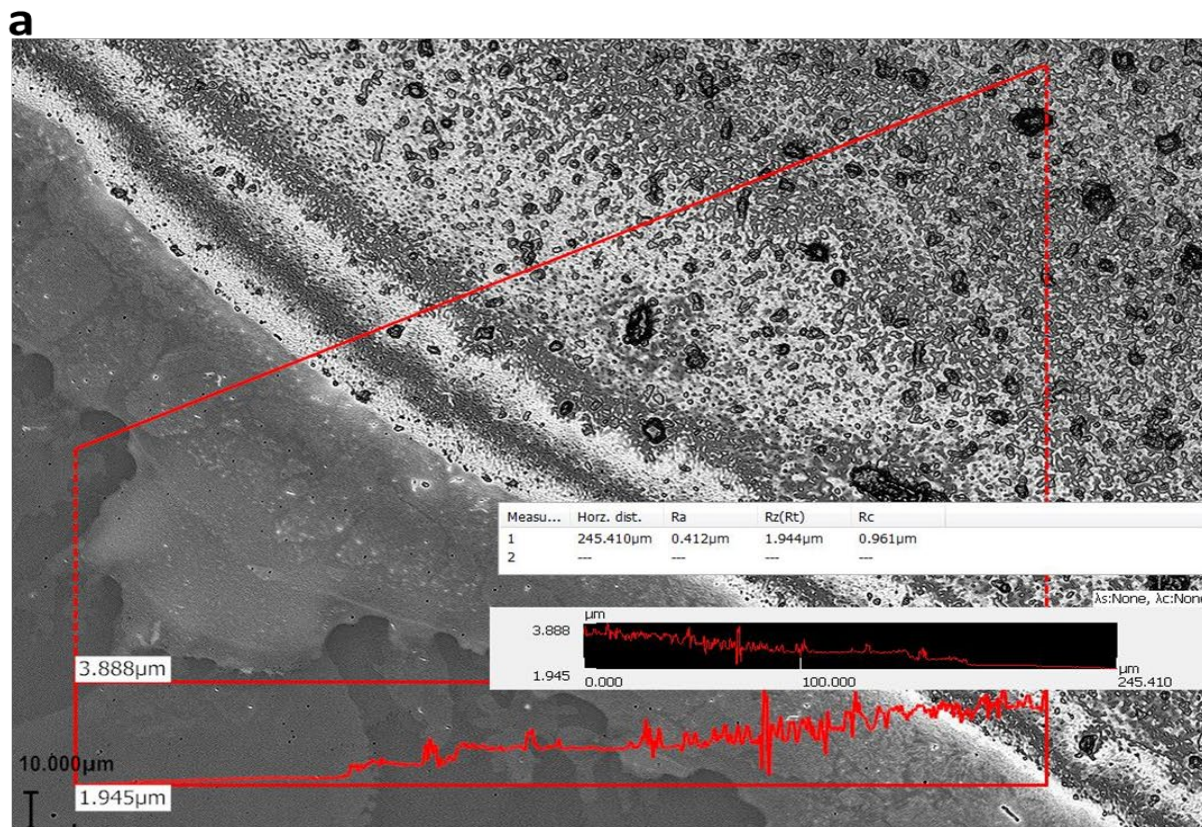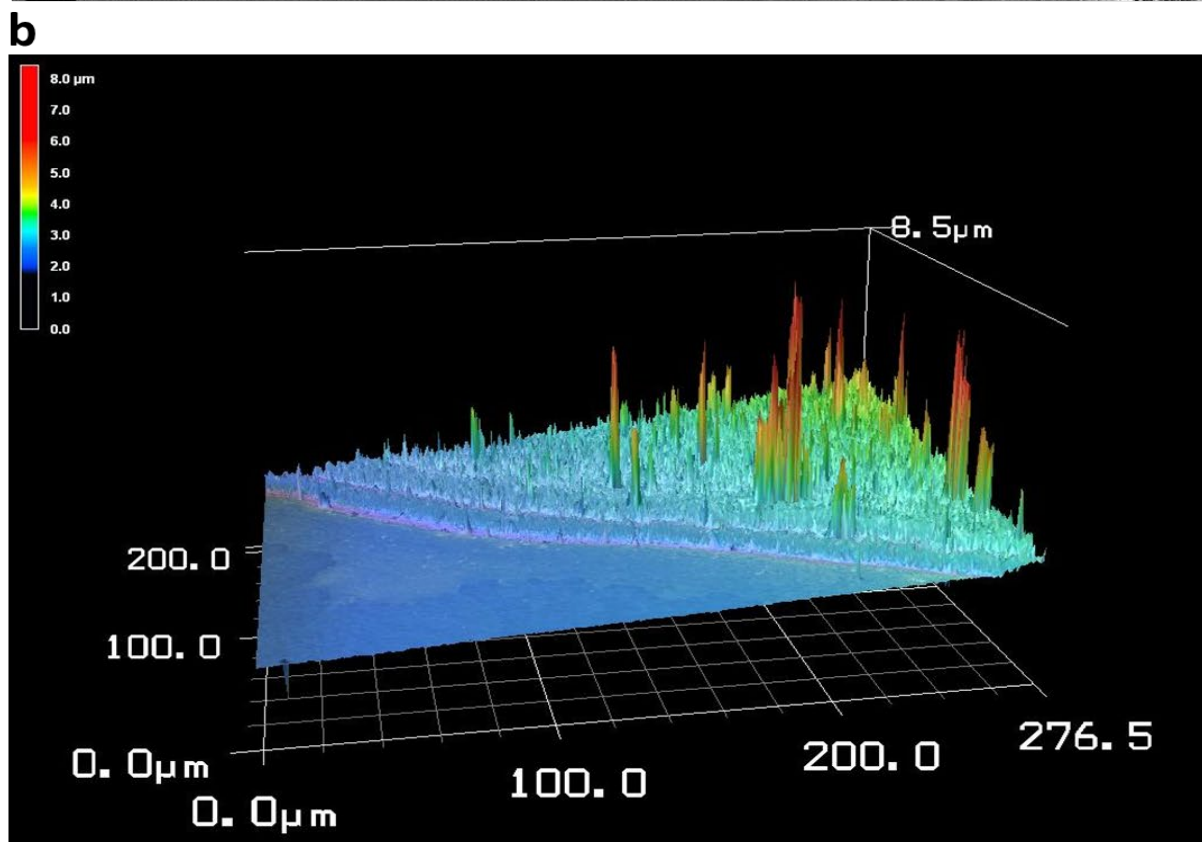

**Figure S26.** (a) Surface roughness profiling of laser scanned region at the edge of DAIA-PDI thin film on Si substrate and (b) 3D height profile image of same area for thickness.
